# MIND TO MIND

Creative writing that explores the abstract side  
of our profession and our lives

Carol Wiley Cassella, M.D., Editor

## Why?

Kathryn E. McGoldrick, M.D.

Plus ça change,  
plus c'est la même chose.  
More than five millennia have passed  
since Sumerians cultivated opium poppies.  
Soon, *papaver somniferum* cast its spell  
widely, on Assyrian, Egyptian, Indian, Minoan,  
Greek, Roman, and Arab Empires.

Then, on to China, Europe, and North America.  
Ether frolics, laughing gas highs, and  
recreational chloroform joined the party.  
With Sigmund Freud extolling the virtues of “coca,”  
William Halsted became ensnared in its trap.  
Fast forward to the twenty-first century.  
Now, we have fentanyl, propofol, hydromorphone,  
sevoflurane, and other enticements  
to lure physicians to premature death.

Why did you succumb, my friend, to temptation?  
You must have felt pummeled, alone  
in your own skin, unable  
to comprehend or maneuver  
your emotions, leaving ineffable wreckage  
in your wake.

---

From the New York Medical College, Valhalla, New York. [kathryn\\_mcgoldrick@nymc.edu](mailto:kathryn_mcgoldrick@nymc.edu)

Accepted for publication April 8, 2014.

Copyright © 2014, the American Society of Anesthesiologists, Inc. Lippincott Williams & Wilkins. Anesthesiology 2014; 121:1122-3

A mystery incapable of being unraveled,  
some amorphous force awry,  
a watershed moment, etched  
in denial of consequences,  
the beckoning kingdom of escape prevailed.  
What toxic brew of denial and bravado  
camouflaged the apple's rot?

It was supposed to be so easy,  
one or two fixes only.  
Just enough to forget the sulking teens, arrogant surgeons,  
and marital tensions.  
You were too special, too clever  
to fall into the abyss.  
Yet, the Rubicon was crossed.  
Irrevocably.  
Blanketed in velvet fog,  
you slithered to your next dose.

Spent, hollow, unable to care,  
You must accept the extended  
arms guiding you to safety.  
Take time to heal the suppurating wounds.  
Get past the past.  
Find glory in the nacreous sky.  
Cherish the quotidian,  
a time when anything can be,  
despite what has been.
